# Supplementary material for: Genetic Dissection of Drought Tolerance of Elite Bread Wheat (Triticum aestivum L.) Genotypes Using Genome Wide Association Study in Morocco
Source: Plants (Basel). 2022 Oct 13;11(20):2705. doi: 10.3390/plants11202705 (PMC9611990; doi:10.3390/plants11202705)
Supplement: Supplementary file 1 [file plants-11-02705-s001.zip]

Archive with 4 entries (4 files):
- supplementary Figures.pdf
- Table S1.xlsx
- Table S2.xlsx
- Table S3.xlsx
