# Supplementary material for: Genetic Dissection of Drought Tolerance of Elite Bread Wheat (Triticum aestivum L.) Genotypes Using Genome Wide Association Study in Morocco
Source: Plants (Basel). 2022 Oct 13;11(20):2705. doi: 10.3390/plants11202705 (PMC9611990; doi:10.3390/plants11202705)
Supplement: Supplementary file 1 [file plants-11-02705-s001.zip › Table S1.xlsx]

## Sheet: Sheet1
Genotyp	Name/Pedigree	GY	DHE	DMA	PLH	C.T	C.C	NPM	NTP	NSS	Biomass
G146	SUDAN#3/SHUHA-6/4/BOW/PRL//BUC/3/WH576	6.16833	61.5	105.5	79.5	22.9	48	40	3.5	49	1.31
G145	STAR *3/LOTUS 5//TNMU/MILAN/3/QAMAR-2	5.75667	61	105.5	75	23.3	45.7	37	3.5	53.5	1.0875
G147	SUNCO/2*PASTOR//ETBW 4921/3/KIRITATI//PRL/2*PASTOR	5.42	65.5	107.5	77.5	22.8	47.8	35	3	41.5	1.26
G167	WHEATEAR//ACHTAR/INRA 1764	5.41667	63.5	106	60	23.925	42.375	36	3	41	1.0925
G159	VEE#5/SARA//DUCULA/3/NJORO SD-7/4/PFAU/MILAN	5.22	69	111.5	79	23	44.075	40	3.5	27.5	1.73
G54	FARIS-17//PFAU/MILAN	5.21333	71.5	109.5	80.5	24.05	47.775	43	3.5	51.5	1.625
G68	HUBARA-1/ETBW 4921	5.16333	68	113.5	81.5	24.025	49.8	45	4	52.5	1.4525
G185	FARAH-7/SHAMIEKH-4	5.135	69	112.5	80	24.2	47.25	38	4	41	1.2125
G107	OAX93.24.35//SOKOLL/WBLL1/4/NS732/HER//ARRIHANE/3/REGRAG-1	5.125	62	109	80.5	24.675	47.025	45	4	46.5	1.1
G97	MILAN/SHA7/3/THB/CEP7780//SHA4/LIRA/4/SHA4/CHIL/5/FARIS-6	5.12333	70	117	77.5	24.2	49.525	35	3	58.5	1.2975
