# Supplementary material for: Genetic Dissection of Drought Tolerance of Elite Bread Wheat (Triticum aestivum L.) Genotypes Using Genome Wide Association Study in Morocco
Source: Plants (Basel). 2022 Oct 13;11(20):2705. doi: 10.3390/plants11202705 (PMC9611990; doi:10.3390/plants11202705)
Supplement: Supplementary file 1 [file plants-11-02705-s001.zip › Table S2.xlsx]

## Sheet: Sheet1
Regime	Trait	Location	Gene	Protein name	Moleculare fonction	biological porsses
Rain fed	NSS	1A:532251634	TraesCS1A02G344000	ATP-dependent 6-phosphofructokinase	6-phosphofructokinase activity	fructose 6-phosphate metabolic process
	NPM	1A:545528557	TraesCS1A02G366700	CRAL-TRIO domain-containing protein	-	-
	NPM	1A:557932838	TraesCS1A02G390200	Auxin-responsive protein	-	auxin-activated signaling pathway
	NPM	1A:564302427	TraesCS1A02G400300	SAC domain-containing protein	phosphatidylinositol-4-phosphate phosphatase activity	phosphatidylinositol dephosphorylation
	NPM	1A:572350882	TraesCS1A02G411900	Ketol-acid reductoisomerase	ketol-acid reductoisomerase activity	isoleucine biosynthetic process
	PLH	1B:11692172	TraesCS1B02G024300	BRX domain-containing protein	-	-
	DHE	1B:56312090	TraesCS1B02G071400	DEUBAD domain-containing protein	-	-
	CT	1B:579797780	TraesCS1B02G349300	Protein-synthesizing GTPase	GTPase activity	formation of translation preinitiation complex
	CT	1B:626226213	TraesCS1B02G393400	RING-type domain-containing protein		cellular macromolecule metabolic process
	GY	2B:33839742	TraesCS2B02G067000	Receptor-like serine/threonine-protein kinase	ATP binding	-
	Biomass	2B:33939928	TraesCS2B02G067300	Amino_oxidase domain-containing protein	flavin adenine dinucleotide binding	-
	Biomass	2D:20769480	TraesCS2D02G053300	Receptor-like serine/threonine-protein kinase	protein serine/threonine/tyrosine kinase activity	-
	Biomass	3A:523554827	TraesCS3A02G292800	DUF1421 domain-containing protein	-	-
	Biomass	3A:568383306	TraesCS3A02G323800	NAD(P)H dehydrogenase (quinone)	NADPH dehydrogenase (quinone) activity	-
	NTP	3B:54757975	TraesCS3B02G086400	E3 ubiquitin-protein ligase	DNA binding	maturation of 5.8S rRNA
	Biomass	3B:822682075	TraesCS3B02G602700	Protein kinase domain-containing protein	protein kinase activity	-
	NPM	3D:603264029	TraesCS3D02G521600	Transcription initiation factor IIE subunit alpha	-	transcription open complex formation at RNA polymerase II promoter
	GY	4A:610640806	TraesCS4A02G322700	F-box domain-containing protein	-	-
	NPM	4A:624925453	TraesCS4A02G345400	Patatin	acylglycerol lipase activity	lipid catabolic process
	PLH	5A:540611537	TraesCS5A02G332100	HTH La-type RNA-binding domain-containing protein	RNA binding	-
	CT	5B:38166746	TraesCS5B02G035200	SAM_MPBQ_MSBQ_MT domain-containing protein	2-methyl-6-phytyl-1,4-benzoquinone methyltransferase activity	methylation
	NSS	5B:580085161	TraesCS5B02G403300	Protein kinase domain-containing protein	protein kinase activity	signal transduction
	NSS	5B:580103342	TraesCS5B02G403400	Aspartate-semialdehyde dehydrogenase	aspartate-semialdehyde dehydrogenase activity	isoleucine biosynthetic process
	NSS	5B:580686253	TraesCS5B02G404800	Fe2OG dioxygenase domain-containing protein	iron ion binding	peptidyl-proline hydroxylation to 4-hydroxy-L-proline
	NSS	5B:580686253	TraesCS5B02G404900	Protein kinase domain-containing protein	protein serine/threonine kinase activity	-
	PLH	5B:704500660	TraesCS5B02G555300	F-box domain-containing protein	-	-
	PLH	5D:552040060	TraesCS5D02G541100	Epimerase domain-containing protein	oxidoreductase activity, acting on the CH-OH group of donors, NAD or NADP as acceptor	-
	PLH	5D:552040060	TraesCS5D02G541200	F-box domain-containing protein	-	-
	PLH	6A:581748362	TraesCS6A02G349200	Cyclic nucleotide-binding domain-containing protein	ion channel activity	-
	CT	6A:609379892	TraesCS6A02G399500	Protein kinase domain-containing protein	protein kinase activity	protein autophosphorylation
	CT	6A:609379892	TraesCS6A02G399600	RING-type domain-containing protein	long-chain fatty acid-CoA ligase activity	cellular macromolecule metabolic process
	CT	6A:610349884	TraesCS6A02G402500	Ubiquitin carboxyl-terminal hydrolase	thiol-dependent deubiquitinase	protein deubiquitination
	NSS	6B:577184321	TraesCS6B02G327500	Glutamine synthetase	glutamate-ammonia ligase activity	glutamine biosynthetic process
	CT	7A:53911180	TraesCS7A02G088800	Pre-mRNA-splicing factor 38	-	mRNA splicing, via spliceosome
Irrigated	NTP	1B:675560923	TraesCS1B02G463400	Structural maintenance of chromosomes protein	double-stranded DNA binding	cell division
	NTP	1B:676192103	TraesCS1B02G465400	Trimethylguanosine synthase	RNA trimethylguanosine synthase activity	7-methylguanosine cap hypermethylation
	NTP	1B:676192103	TraesCS1B02G465400	Trimethylguanosine synthase	RNA trimethylguanosine synthase activity	7-methylguanosine cap hypermethylation
	CC	1D:435801502	TraesCS1D02G349700	Reticulon-like protein	-	response to bacterium
	NPM	2D:605370885	TraesCS2D02G513500	4-hydroxy-tetrahydrodipicolinate synthase	4-hydroxy-tetrahydrodipicolinate synthase activity	diaminopimelate biosynthetic process
	CC	5B:35976675	TraesCS5B02G032700	Kinesin-like protein	microtubule binding	microtubule-based movement
	Biomass	5B:484735572	TraesCS5B02G300100	Trigger_N domain-containing protein	peptidyl-prolyl cis-trans isomerase activity	chaperone-mediated protein folding
	NPM	5B:566504645	TraesCS5B02G387100	Histone H2A	protein heterodimerization activity	heterochromatin assembly
	NPM	5B:566504645	TraesCS5B02G387300	Sulfate adenylyltransferase	adenylylsulfate kinase activity	sulfate assimilation
	NSS	5D:546650824	TraesCS5D02G530300	Pre-mRNA processing factor	mRNA binding	mRNA splice site selection
	NSS	5D:546689186	TraesCS5D02G530600	Receptor-like serine/threonine-protein kinase	protein serine/threonine/tyrosine kinase activity	recognition of pollen
	PLH	7A:706832129	TraesCS7A02G524300	NB-ARC domain-containing protein	ADP binding	defense response
