# Supplementary material for: Genetic Dissection of Drought Tolerance of Elite Bread Wheat (Triticum aestivum L.) Genotypes Using Genome Wide Association Study in Morocco
Source: Plants (Basel). 2022 Oct 13;11(20):2705. doi: 10.3390/plants11202705 (PMC9611990; doi:10.3390/plants11202705)
Supplement: Supplementary file 1 [file plants-11-02705-s001.zip › Table S3.xlsx]

## Sheet: Sheet1
Genotypes	Name/Pedigree	Selection History	Sidi Al-Aidi Rainfed											Sidi Al-Aidi Irrigated											Merchouch Rainfed
G1	Terbol		DHE	DMA	PLH	C.T	C.C	NPM	NTP	NSS	Biomass	GY	TKW	DHE	DMA	PLH	C.T	C.C	NPM	NTP	NSS	Biomasse	GY	TKW	DHE	DMA	PLH	C.T	CC	NPM	NTP	Biomass	GY	TKW
G2	Atlas		86.5	123.5	60.5	24.425	49.775	31	4	34.5	0.93	3.45	42	72.5	117	76.5	22.75	52.45	28	5	59	1.65	1.89333	18.1	64	123	62	25.4	48.5	36	5	5.34	4.68	30
G3	Tesfa		60.5	103.5	66	24.175	42.75	39	3	22.5	0.9925	4.02667	38.3	70.5	116.5	74	22.35	45.35	36	4	94.5	1.83	2.15333	17.4	60	119	68	26.2	55.1	42	6	4.62	4.44	30
G4	22SAWSN - 142/3/PASTOR//MUNIA/ALTAR 84/4/SHAMISS-3	ICW08-50394-16AP-0AP-0AP	72	105	61	24.875	50.65	32	4	35.5	1.13	4.00833	38.9	69.5	115	77.5	23	53.15	60	5	60.5	2.79	2.75333	19.2	65	122	51	26.3	53.2	30	6	4.26	4.44	34
G5	22SAWSN - 142/3/PASTOR//MUNIA/ALTAR 84/4/SHAMISS-3	ICW08-50394-3AP-0AP-0AP	70	109	62.5	23.6	47.375	37	3.5	31	1.075	4.335	40.9	72	116	84.5	23.25	52.1	24	3	59.5	1.38	2.80667	23	65	122	50	27.7	48.2	48	7	3.756	4.4	31
G6	22SAWSN - 142/ETBW 4921/6/HPO/TAN//VEE/3/2*PGO/4/MILAN/5/SSERI1	ICW08-50395-11AP-0AP-0AP	70	109	63	23.95	52.05	40	4.5	52.5	0.865	4.88167	36.1	71.5	112	72.5	22.55	51.9	52	4	58.5	3.96	2.86667	18.5	65	123	59	27.7	51.8	36	5	3.276	4.8	36
G7	22SAWSN - 142/ETBW 4921/6/HPO/TAN//VEE/3/2*PGO/4/MILAN/5/SSERI1	ICW08-50395-10AP-0AP-0AP-1KUL-010DZ	67	105.5	73.5	23.925	48.1	44	4.5	49	0.7925	3.32333	38.4	71	113	71	23.55	50.1	48	4	50.5	3.18	2.90667	24.6	55	114	71	24.6	50.3	42	6	3.54	5.8	33
G8	22SAWSN - 142/ETBW 4921/6/HPO/TAN//VEE/3/2*PGO/4/MILAN/5/SSERI1	ICW08-50395-22AP-0AP-0AP-1KUL-010DZ	60	105.5	67.5	24.525	46.575	38	4.5	44.5	1.145	3.98167	37.8	75	118.5	80.5	24	51.25	24	8	48	2.25	3.08667	23.1	58	119	68	25.6	45.7	48	5	4.08	4	31
G9	ABIER-2/QADANFER-4	ICW07-0530-3AP-0AP-0AP-5AP-0KUL	64	109.5	63	24.675	43.9	38	5	40.5	0.795	3.635	37.4	65.5	109.5	83.5	23.4	46.5	52	6	61.5	2.91	3.09333	22.2	60	117	64	25.6	48.3	42	6	4.26	4.96	33
G10	ABIER-2/QADANFER-4	ICW07-0530-5AP-0AP-0AP-3AP	69	115.5	69	24.575	49.675	33	4	40.5	0.675	0.978333	36.9	70.5	115	77.5	23.7	41.45	20	7	66.5	1.56	3.18667	20.1	55	115	63	26.3	50.2	48	6	3.516	4.04	32
G11	ABIER-2/QADANFER-4	ICW07-0530-3AP-0AP-0AP-3AP	64	104	67.5	24.425	46.575	33	3.5	40.5	0.9125	2.83167	40.9	71.5	112	74.5	22.75	47.95	36	4	73	1.74	3.19333	24.1	61	120	63	26.5	49.2	36	5	3.87	4.64	28
G12	ABU-REYAA-1/LEITH-1	ICW08-00049-1AP-3AP-0AP-5KUL-010DZ	59.5	104.5	64	24.65	46.925	32	3.5	53.5	1.095	3.96	42.6	71.5	112	71	22.3	52.05	44	5	64	1.68	3.28667	17.6	61	120	61	24.2	51.2	48	6	3.156	4.44	30
G13	ABU-REYAA-1/LEITH-1	ICW08-00049-1AP-3AP-0AP-2KUL-010DZ	65.5	106.5	63.5	25.175	49.125	36	4	44	0.905	5.085	36	71	114.5	73	22.65	51.9	40	5	49.5	2.19	3.28667	18.5	64	122	57	24.9	47.5	42	6	3.3	4.44
G14	ABUZIG-10//2*PFAU/MILAN	ICW08-50463-10AP-0AP-0AP-2KUL-010DZ	68	107.5	68.5	22.525	46.825	31	3	35.5	1.0675	3.98833	40.2	70.5	116	72	24.3	48.5	24	7	60	1.71	3.34	19.6	64	124	56	23.3	54.9	48	5	3.276	4.4	35
G15	ABUZIG-10//2*PFAU/MILAN	ICW08-50463-10AP-0AP-0AP-1KUL-010DZ	70	111	55.5	23.925	45.05	44	3	39.5	0.7475	3.40833	34.9	69.5	114	80.5	22.55	47.4	28	9	48.5	2.64	3.44667	16.5	64	124	44	25.2	45.7	36	4	3.75	4.48	33
G16	ABUZIG-10//2*PFAU/MILAN	ICW08-50463-3AP-0AP-0AP-5KUL-010DZ	72	112	61	23.725	47.4	42	3.5	42	0.895	3.97667	37.6	72.5	115	76	23.25	50.05	36	4	47	1.71	3.45333	17.6	64	124	50	26.3	49.2	48	5	2.988	2.96	27
G17	ABUZIG-10//2*PFAU/MILAN	ICW08-50463-10AP-0AP-0AP-4KUL-010DZ	60	102	23	23.65	50.525	32	4	37.5	0.9075	4.11167	36.2	89.5	136.5	80.5	23.1	50	56	5	69	3.54	3.46667	20.8	59	118	61	25.4	51.6	42	6	3	3.24	35
G18	ABUZIG-10//2*PFAU/MILAN	ICW08-50463-3AP-0AP-0AP-2KUL-010DZ	68.5	104.5	64	23.675	45.825	37	3.5	30.5	1.0175	4.11333	39	65	113	82	22.6	46.35	44	5	53.5	1.8	3.54667	20.3	62	123	70	25.6	47.2	48	6	4.5	4.12	35
G19	ALMAZ-11/3/PASTOR/FLORKWA-1//PASTOR	ICW07-0505-4AP-0AP-0AP-4AP	66	108.5	68.5	24.05	49.275	35	4	34.5	1.07	4.43833	37.5	73	115	81.5	21.3	55.6	40	4	80	2.16	3.60667	20.2	59	118	52	25.1	55	54	5	3.78	4.2	33
G20	ALMAZ-11/3/PASTOR/FLORKWA-1//PASTOR	ICW07-0505-3AP-0AP-0AP-3AP	66	109.5	67.5	23.5	46.175	35	3	38.5	1.05	4.52167	35.9	72.5	116	74.5	22.1	50.65	20	5	67.5	1.65	3.71333	19.9	60	120	56	25.4	53.6	48	7	4.05	3.48	35
G21	ALMAZ-15/SOMAMA-3	ICW07-0507-5AP-0AP-0AP-1AP	68	109.5	68	24.075	44.85	42	4	39	1.1125	3.75	38.2	67.5	114.5	79.5	22.3	49.45	24	3	48	3.72	3.75333	19.6	63	122	42	24.4	44.9	42	5	4.02	2.32	37
G22	ALMAZ-19/ETBW 4919/3/NING MAI 9558//CHIL/CHUM18	ICW08-50312-2AP-0AP-0AP-2TR	66.5	110	70.5	23.425	47.975	34	3.5	39.5	0.8975	4.525	38.4	73.5	117	72	22.6	53.7	24	5	55.5	1.92	3.79333	22	61	123	55	24.7	47.6	48	6	2.94	2.52	36
G23	ALMAZ-19/ETBW 4919/3/NING MAI 9558//CHIL/CHUM18	ICW08-50312-2AP-0AP-0AP-1TR	69	111	75	23.25	47.05	38	4	48.5	1.07	3.08667	37.6	72.5	115.5	76	23.25	48.55	32	5	61	3.78	3.84	20.4	55	113	65	26.1	47.1	54	7	4.29	3.16	37
G24	ALMAZ-21/TAZA-1/3/NING MAI 9558//CHIL/CHUM18	ICW08-50314-4AP-0AP-0AP-3TR	69	113.5	71	23.275	49.7	46	4	37	1.1775	4.51667	34.8	72	115.5	84	23.05	49.85	32	5	52	3.06	3.85333	17.8	64	125	57	25.8	53	42	6	3.18	5.48	33
G25	ANBER-6//WORRAKATTA/PASTOR	ICW08-00013-1AP-0AP-0AP-3KUL-010DZ	63	103	69	24.325	48.95	33	4	42	1.1125	4.65833	33	67.5	115	74	24.15	47.5	28	5	43.5	1.71	3.86667	17.5	64	124	52	25.1	48.2	48	7	3.45	4	29
G26	ANBER-6//WORRAKATTA/PASTOR	ICW08-00013-1AP-0AP-0AP-1KUL-010DZ	60.5	100	83	23.6	45.8	34	3.5	27	0.9625	4.69667	37	71	119.5	70.5	22.7	45.75	24	5	53.5	2.04	3.88	19.7	64	124	56	26.1	51.3	54	7	3.12	3.68	28
G27	ASEEL-1//MILAN/PASTOR/3/SHAMISS-3	ICW08-50343-4AP-0AP-0AP-3TR	60.5	98.5	85.5	24.025	45.575	34	4.5	35.5	1.29	4.26	35.7	70.5	113.5	77	22.95	48	28	7	61	2.82	3.92	17.6	64	124	56	26.4	48.9	48	6	3	3.96	37
G28	ASEEL-1//MILAN/PASTOR/3/SHAMISS-3	ICW08-50343-8AP-0AP-0AP-3TR	62.5	109	53.5	23.575	46.575	33	4	32	0.73	4.11333	36.7	69.5	111.5	76	22.95	50.25	48	6	61	1.62	3.98	19.7	59	120	59	24.3	51.4	42	6	3.33	3.92	35
G29	ASEEL-1//MILAN/PASTOR/3/SHAMISS-3	ICW08-50343-8AP-0AP-0AP-2TR	65	110	69	24.55	47.65	33	3.5	52	0.875	4.01167	39	72	114.5	67.5	22.65	46.3	32	6	65.5	2.55	4.02667	20.9	58	118	54	24.2	57.6	48	6	2.736	4.44	31
G30	ASEEL-1//SHUHA-4/CHAM-8	ICW07-0568-2AP-0AP-0AP-5AP	64	110	71	24.7	49.05	30	3.5	42	0.95	4.15833	38.6	69.5	116	83.5	22.35	54.05	28	5	58	1.41	4.02667	21.2	55	114	65	25.8	49.6	54	7	2.55	5.16	33
G31	ASEEL-1//SHUHA-4/CHAM-8	ICW07-0568-6AP-0AP-0AP-4AP	68.5	106.5	60	23.675	48.025	40	3.5	38.5	0.9825	4.18167	37	73	116	76.5	22.75	48	32	5	56	3.03	4.05333	18.6	62	120	60	26.2	47.8	48	6	3.336	5.36	33
G32	Atlas		69	107.5	69	23.525	48.275	37	3.5	41.5	1.0875	4.79833	37.6	71	118.5	76.5	24.7	48.2	32	4	38.5	2.94	4.05333	22.5	62	120	59	23.1	54.8	42	5	4.02	3.84	34
G33	ATTILA*2/AMAD//ENKOY/3/PFAU/MILAN	ICW08-50250-3AP-0AP-0AP-2KUL-010DZ	68	111.5	74	24.15	47	40	4	36.5	1.165	4.29667	39.5	68.5	112	73	23.45	48.85	28	7	49.5	2.43	4.11333	18.4	62	120	56	25.6	49.6	36	6	3.27	3.56	34
G34	ATTILA*2/AMAD//ENKOY/3/PFAU/MILAN	ICW08-50250-3AP-0AP-0AP	66.5	107.5	70.5	24	48.425	46	5	40.5	1.505	3.965	36.9	71	117	86	22.55	55.15	36	6	95	3.51	4.14667	21.1	60	121	64	25.8	49.3	42	6	4.29	5.04	36
G35	ATTILA*2/AMAD//ENKOY/3/PFAU/MILAN	ICW08-50250-3AP-0AP-0AP-1KUL-010DZ	67.5	115	70	23.675	49.675	42	4.5	53	1.1	4.72	38.5	65.5	113.5	82	22.8	51.4	32	5	55.5	2.55	4.17333	17.3	64	122	54	26.6	52.2	48	6	3.18	4.12	34
G36	ATTILA*2/AMAD//ENKOY/3/PFAU/MILAN	ICW08-50250-9AP-0AP-0AP	66.5	110.5	69	23.65	47.2	35	3	71.5	1.2625	4.32333	39.3	69.5	115	71	21.85	49.9	28	6	52	2.25	4.20667	18.6	62	122	55	25.6	44.6	48	7	3.156	3.6	40
G37	ATTILA*2/AMAD//ENKOY/3/PFAU/MILAN	ICW08-50250-3AP-0AP-0AP-3KUL-010DZ	67.5	114	72	22.575	48.65	39	3.5	52.5	1.4375	4.565	38.1	72	115	76.5	24	49	24	6	85	2.25	4.24667	18.8	63	121	51	26.8	53.4	54	6	3.24	3.68	33
G38	ATTILA*2/AMAD//PASTOR-6	ICW07-0415-4AP-0AP-0AP-3AP	68.5	115	78	23.5	48.825	39	4	42	1.88	4.51	39.1	71	116	84	21.65	47.1	32	5	49	3.12	4.28	19.6	56	115	70	25.3	52.6	42	5	3.15	4.48	35
G39	ATTILA*2/CROW//MILAN/PASTOR	ICW07-0421-3AP-0AP-0AP-5AP	63.5	106.5	79	23.4	45.125	33	3	36	1.435	4.07667	41	72.5	116.5	71.5	23.2	49.05	28	5	68.5	1.56	4.28667	19.7	55	113	68	24.6	54.8	36	6	3.24	4.04	32
G40	ATTILA/3*BCN//ETBW 4919/4/BOW/PRL//BUC/3/WH576	ICW08-50067-1AP-0AP-0AP-4TR	66	111.5	81.5	22.825	50.1	37	4	42	1.2375	4.03833	39.9	72.5	116	75.5	22.95	49.7	36	4	67	2.25	4.36		57	115	69	25.1	55.4	42	6	3.84	3.64	35
G41	ATTILA/3*BCN//ETBW 4919/4/BOW/PRL//BUC/3/WH576	ICW08-50067-1AP-0AP-0AP-1TR	70	103	76.5	23.2	49.8	41	4	43	1.53	5.04	41.5	72	116	73	22.65	34.7	44	7	67.5	3.6	4.42667	20.6	64	122	58	26.3	51	48	6	3.96	4.28	33
G42	ATTILA/3*BCN//MILAN/DUCULA	ICW07-0095-5AP-0AP-0AP-3AP	64.5	108	77	24.35	49.85	36	3.5	48.5	0.875	3.47333	39.6	71	117	84.5	22.9	50.1	24	6	64	4.44	4.46667	21.7	57	116	70	25.2	51.4	48	6	3.39	3.16	40
G43	ATTILA/3*BCN//MILAN/DUCULA	ICW07-0095-5AP-0AP-0AP-4AP-0KUL	65.5	105.5	65.5	24.45	49.625	35	3.5	42	0.9725	3.425	38.9	73	115.5	80.5	24.15	55.05	32	5	46.5	2.19	4.48	20.6	61	121	50	25.9	49.1	42	5	3.78	3.6	36
G44	ATTILA/3*BCN//MILAN/DUCULA	ICW07-0095-2AP-0AP-0AP-4AP	66.5	102	73	23.775	45.675	36	3	45.5	0.865	3.59	36.8	73.5	117	80.5	23.2	49.25	40	6	54.5	3	4.49333	18.8	62	121	77	24.1	51	48	6	3.276	4.2	36
G45	ATTILA/3/URES/PRL//BAV92/4/WBLL1/5/ATTILA-3//NESMA*2/14-2/3/NS732/HER//KAUZ'S'	ICW08-00174-3AP-0AP-0AP-5TR	68	107	66.5	24.6	46.225	44	4	37	1.135	3.48667	38.2	67.5	112	72.5	22.65	48.55	40	4	43.5	2.94	4.49333	20.8	62	122	54	26.1	48.2	42	6	2.85	5	38
G46	ATTILA-1/NS732/HER//PARUS/PASTOR/3/TEMPORALERA M 87*2/KONK	ICW08-50185-1AP-0AP-0AP-1TR	72	111	69.5	24	49.475	38	3	50.5	0.89	3.805	37.5	67	114	80	24.25	49.95	20	4	70	3.3	4.55333	19	62	122	68	26.2	45.6	54	7	2.91	4.24	37
G47	ATTILA-1/NS732/HER//PARUS/PASTOR/3/TEMPORALERA M 87*2/KONK	ICW08-50185-7AP-0AP-0AP-5TR	58	106	74.5	23.4	49.525	44	3.5	43.5	1.1125	4.08	38.6	68	110.5	72.5	22.9	51.25	60	5	46.5	3.51	4.57333	21.8	53	111	65	25.9	48.1	48	6	4.05	4.52	29
G48	ATTILA-1/NS732/HER//PARUS/PASTOR/3/TEMPORALERA M 87*2/KONK	ICW08-50185-1AP-0AP-0AP-2TR	62	107	65.5	23.525	51.825	36	3.5	33.5	1.0275	4.58	37.5	67	114	73.5	23.3	49.2	24	6	91.5	2.22	4.58	19.6	60	119	54	25.9	45.7	24	5	4.38	4.28	33
G49	AZD-2//PFAU/MILAN	ICW07-0205-1AP-0AP-0AP-4AP	67.5	108	72	24	45.65	40	4	45.5	1.0075	4.55	40.6	67	109.5	72.5	22.45	48.05	36	5	58.5	2.67	4.59333	18.3	61	122	66	24.8	49.3	36	5	3.516	4.32	36
G50	AZD-2//PFAU/MILAN	ICW07-0205-1AP-0AP-0AP-1AP	61.5	106.5	68	23.975	47.25	43	3.5	43.5	0.93	4.44	40.6	72	114	72.5	23.55	49.25	56	6	65	2.19	4.62667		54	115	65	25.1	51.6	42	6	3.96	4.36	36
G51	BAASHA-14//PFAU/MILAN	ICW07-0746-3AP-0AP-0AP-1AP	68	107.5	74	23.675	47.15	40	3	53	1.04	3.26833	41.9	67	110	73.5	24.25	48.7	32	6	45	2.64	4.66	19.7	56	115	63	25.8	47.2	36	5	3.45	4.16	35
G52	BAASHA-14//PFAU/MILAN	ICW07-0746-1AP-0AP-0AP-4AP	65.5	110.5	77	24.35	48.05	46	4	29	0.885	4.23667	39.3	68.5	111.5	84	22	54.2	40	3	71	2.79	4.69333	18.8	60	118	64	24.4	51.5	30	4	3.78	3.96	33
G53	BAASHA-14//PFAU/MILAN	ICW07-0746-1AP-0AP-0AP-2AP-0KUL	65.5	109.5	75	23.775	44.575	43	3.5	29	1.0875	4.7	40.6	70	114	86.5	21.95	45.7	48	4	34.5	2.76	4.73333	18.8	60	118	67	24.4	44.9	36	7	4.02	2.52	33
G54	BAASHA-14//PFAU/MILAN/3/SHAMIEKH-2	ICW08-50458-4AP-0AP-0AP-5TR	65.5	110	80	24.275	50.775	38	4.5	52	1.2425	5.08667	41.9	68	112	77	24.45	46.65	32	5	57.5	2.4	4.74	18.9	61	122	73	23.9	46.7	48	6	3.576	3.6	32
G55	BAASHA-14//PFAU/MILAN/3/SHAMIEKH-2	ICW08-50458-4AP-0AP-0AP-1TR	71.5	109.5	80.5	24.05	47.775	43	3.5	51.5	1.625	5.21333	38.5	72.5	117	72	23.6	53.75	24	5	56	2.07	4.84	19.7	61	122	60	24.4	42.3	42	5	3.36	3.68	35
G56	BABAX/LR42//BABAX*2/3/KUKUNA/4/ATTILA*2/CROW	ICW08-00238-2AP-0AP-0AP-4TR	68	109.5	77.5	24.1	48.075	42	3	34.5	1.27	4.25167	38.1	71	117	75.5	22.25	50.05	32	6	58.5	2.82	4.84667	18.9	61	122	66	24.3	51.2	48	5	3.69	3.48	34
G57	BACANORA 86//TAST/TORIA/3/PFAU/MILAN	ICW07-0784-1AP-0AP-0AP-4AP	65.5	106.5	75.5	24.95	47.975	37	4	59.5	1.065	4.045	38.5	68	112.5	73	22.55	52	20	5	60.5	2.4	4.92	21	55	113	66	24.6	47.8	54	6	4.47	4.48	33
G58	BACANORA 86//TAST/TORIA/3/PFAU/MILAN	ICW07-0784-1AP-0AP-0AP-3AP	59.5	96.5	66	24.1	50.925	40	3	56	0.9275	4.485	36	68	114	82	23.1	48.85	36	6	58.5	2.07	4.94667	19.5	63	122	58	24.6	49.7	42	5	3.45	4.16	33
G59	BACANORA T 88/RUTH-2	ICW07-0002-4AP-0AP-0AP-3AP-0KUL	65.5	109.5	66	23.725	50.25	38	3.5	64	1.135	4.33667	37.5	69.5	114	83	23.05	51	40	5	46.5	3.36	4.96667	17.7	63	122	64	25.3	49.3	48	5	3.69	4.04	41
G60	BACANORA T 88/RUTH-2	ICW07-0002-4AP-0AP-0AP-3AP	65.5	110	64	24	47.975	39	4.5	53.5	1.05	4.33	38.3	85.5	114.5	78.5	24.85	49	24	7	58	2.7	4.97333	19.4	64	123	57	25.2	55.8	36	5	3.36	4.24	36
G61	BACANORA T 88/RUTH-2	ICW07-0002-4AP-0AP-0AP-2AP	61.5	107	60	23.275	46.45	40	3	55	0.8	3.58333	38.6	69	112.5	68.5	22.55	52.95	36	5	75	3.15	5	21.5	55	117	48	24.8	44.8	42	6	3.63	3.8	37
G62	BACANORA T 88/RUTH-2	ICW07-0002-7AP-0AP-0AP-2AP	65.5	112.5	63	24	47.65	39	3.5	73	1.17	4.05	39.4	70.5	115.5	78	23	47.45	32	4	52	3.3	5.04667	20.9	62	122	55	25.5	48.1	48	5	3.09	4.12	35
G63	BACANORA T 88/RUTH-2//PFAU/MILAN	ICW08-50001-6AP-0AP-0AP-1TR	67	109	63	23.45	49.075	42	4	69.5	1.12	4.605	36.2	73.5	116.5	84	23.35	45.75	20	8	64	3.21	5.05333	21	62	122	62	24.9	45.9	36	4	2.25	4.88	36
G64	BACANORA T 88/RUTH-2//PFAU/MILAN	ICW08-50001-6AP-0AP-0AP-2TR	65	108	70	23.75	49.75	37	3.5	55	0.835	4.69167	41.8	69	116.5	74.5	22.85	49.35	28	5	53.5	2.76	5.06	22	56	116	65	24.5	50.8	42	6	3.876	3.92	32
G65	BAOBAB-1//MILAN/PASTOR	ICW07-0407-0AP-0AP-0AP-6AP-0KUL	70	115	71	23.95	45.75	39	3.5	45	1.09	2.85	42.7	73	116	78.5	22.35	49.3	24	8	59.5	2.85	5.08667	24.1	53	113	73	25.2	50.5	48	6	3.24	4	35
G66	BAOBAB-1//MILAN/PASTOR	ICW07-0407-0AP-0AP-0AP-6AP	66	108.5	77.5	23.3	48.975	32	3.5	37.5	0.9	4.735	41.9	64.5	113.5	72	24.75	46.1	28	5	58	2.85	5.08667	20.6	59	117	69	23.9	53.9	42	5	3.54	5.36	35
G67	BAOBAB-1//MILAN/PASTOR	ICW07-0407-0AP-0AP-0AP-1AP	63.5	107	73	23.7	47.825	37	4	31.5	1.0525	3.84333	39.2	73	118	75	23.7	50.25	28	6	65	2.91	5.08667	21	56	114	72	24.2	55.5	42	6	3.516	3.64	36
G68	BOW/PRL//BUC/3/WH576/4/ETBW 4919	ICW07-0167-0AP-0AP-0AP-3AP	66	111.5	78	23.675	51.5	37	3.5	32.5	1.255	4.07333	41.3	72	114	77	22.5	51.25	24	3	54	2.13	5.2	21.3	55	113	79	25.1	52.4	36	5	4.02	4.56	33
G69	BOW/PRL//BUC/3/WH576/4/N-AZRAQ-2	ICW07-0169-1AP-0AP-0AP-5AP-0KUL	68	113.5	81.5	24.025	49.8	45	4	52.5	1.4525	5.16333	40.4	72	115	85.5	22.45	55.4	32	5	52	2.4	5.2	19.9	61	122	67	25.9	56.7	48	6	3.6	4.48
G70	BOW/PRL//BUC/3/WH576/4/N-AZRAQ-2	ICW07-0169-1AP-0AP-0AP-5AP	63	110.5	77	24.475	50.625	33	4	56.5	1.1225	4.765	37.9	70.5	114	77.5	23.05	51.65	48	5	61	2.88	5.20667	21	60	120	71	25.4	45	42	5	3.876	3.16	32
G71	BOW/PRL//BUC/3/WH576/4/N-AZRAQ-2	ICW07-0169-6AP-0AP-0AP-7AP	64	109	73.5	23.65	46.225	45	4.5	49.5	1.43	4.91833	41.6	69	116	75.5	22.5	53.45	52	4	55.5	2.91	5.21333	20.7	56	117	65	25.7	48.1	48	6	4.53	5.4	31
G72	CHAM-4//NS732/HER/3/ETBW 4920/5/CHEN/AEGILOPS SQUARROSA (TAUS)//BCN/3/VEE#7/BOW/4/PASTOR	ICW08-50410-6AP-0AP-0AP-2TR	66.5	109	74	23.575	49.4	37	4.5	49	0.9325	4.15	37	70	113	79.5	22.5	50	44	6	31	2.16	5.26	21.9	62	121	57	24	52.8	48	5	3.87	4.16	37
G73	CHAM-4//NS732/HER/3/ETBW 4920/5/CHEN/AEGILOPS SQUARROSA (TAUS)//BCN/3/VEE#7/BOW/4/PASTOR	ICW08-50410-15AP-0AP-0AP-4TR	72	110.5	70	23.7	51.8	42	4	33	1.325	2.73	38.6	66	111	73	22.95	46.9	32	6	64.5	3.51	5.28667	19.9	62	121	62	24.5	42	54	6	3.72	2.84	33
G74	CHAM-6/SHUHA-14//ETBW 4921	ICW07-0673-0AP-0AP-0AP-3AP-0KUL	66	111	77.5	23.425	46.325	41	3.5	40.5	1.6125	4.09333	40.4	72.5	114.5	72.5	24.05	48.1	48	5	48	2.1	5.3	20	61	120	63	25.8	46.4	42	6	4.476	4.16	32
G75	CHAM-6/SHUHA-14//MOONTASIR-2	ICW07-0672-3AP-0AP-0AP-2AP	60	104.5	66	23.7	48.5	45	4	48	1.195	4.665	36.6	72	119	75.5	22.9	48.3	20	8	49	3.66	5.3	20.2	61	120	72	26.6	51.6	48	6	4.8	3.12	37
G76	CHAM-6/SHUHA-14//MOONTASIR-2	ICW07-0672-3AP-0AP-0AP-3AP	61.5	105	65	23.6	51.125	49	3	40	1.615	4.21833	38	68.5	113	80	22.85	52.75	32	6	66	2.28	5.32	21.8	60	118	65	24.6	47.8	36	5	4.26	3.24	34
G77	CHAM-6/SHUHA-14/5/KAUZ/3/MYNA/VUL//BUC/FLK/4/MILAN	ICW07-0669-7AP-0AP-0AP-6AP	60	107	70	23.85	52.95	43	3	40	1.3525	4.62	42.2	67.5	113	86	22.35	53	32	7	74	2.52	5.36	19.4	61	122	62	24.8	53.4	42	5	3.576	3.48	33
G78	CHAM-6/SHUHA-14/5/KAUZ/3/MYNA/VUL//BUC/FLK/4/MILAN	ICW07-0669-7AP-0AP-0AP-5AP	66.5	107	67	24.175	47.85	39	4	57	1.64	4.475	34.8	67.5	114	79	23.45	52.1	28	4	45	1.92	5.52667	18.8	62	123	64	24.7	46.5	48	6	4.23	4.08
G79	CHAM-6/SHUHA-14/5/KAUZ/3/MYNA/VUL//BUC/FLK/4/MILAN	ICW07-0669-7AP-0AP-0AP-1AP	72	112	67.5	23.4	47.45	35	3	50.5	1.485	4.84667	38.8	68	113	83	23.4	49.7	32	4	51	3.51	5.52667	21.1	60	120	65	25.4	50.2	36	5	4.05	4.04	38
G80	CHAM-6/SHUHA-14/5/KAUZ/3/MYNA/VUL//BUC/FLK/4/MILAN	ICW07-0669-6AP-0AP-0AP-5AP	73.5	105.5	70.5	24.025	47	36	3.5	37.5	1.225	4.13267	39.3	65.5	110.5	80	23.95	48.35	20	5	39.5	2.55	5.52667	20.5	53	111	67	24.3	48.5	42	6	4.5	3.08	33
G81	CHAM-6/SHUHA-14/5/KAUZ/3/MYNA/VUL//BUC/FLK/4/MILAN	ICW07-0669-8AP-0AP-0AP-6AP-0KUL	60	106	60.5	23.1	46.45	30	3.5	51.5	1.21	4.37667	33.2	66	108.5	84.5	22.55	50.1	32	6	45.5	2.55	5.55333	19.5	56	114	66	23.4	55.3	42	5	3.78	3.44	33
G82	CHAM-8/FLAG-3//MILAN/PASTOR	ICW08-50003-16AP-0AP-0AP	69.5	108.5	65	23.75	48.925	34	3	76	0.9475	3.61167	38	72.5	115	83.5	22.8	50.25	28	6	54.5	1.62	5.56667	19	63	122	51	25.3	52.7	48	6	4.11	3.4	34
G83	CHAM-8/FLAG-3//MILAN/PASTOR	ICW08-50003-14AP-0AP-0AP	70.5	108.5	69	32.675	42.275	33	3.5	51	1.345	3.80833	34.7	64.5	113	73	22.6	52	48	6	36.5	2.67	5.57333	17.3	62	123	63	24.6	50.4	42	6	4.56	3.76	34
G84	CHAM-8/RUTH-3	ICW07-0006-5AP-0AP-0AP-1AP	70.5	113	66.5	25.025	47.575	40	4	50	1.0725	3.65667	35.4	70	114	77	23	48.3	44	7	42.5	3.48	5.58667	18	62	123	60	24.4	54.6	36	5	3.276	3.76	29
G85	CHAM-8/RUTH-3	ICW07-0006-4AP-0AP-0AP-5AP	55	106	73	24.025	45.8	36	4	28.5	0.925	3.39833	38.8	64.5	111.5	82.5	23.2	44.7	28	5	39	2.34	5.63333	19.6	55	115	71	25.9	49.2	36	5	3.36	3.28	37
G86	CHAM-8/RUTH-3	ICW07-0006-4AP-0AP-0AP-4AP	59	105	70.5	24.975	48	33	3	71	0.9775	4.38667	41.3	65.5	115	77	23.6	47.2	28	5	57	3.63	5.64		55	115	74	24.9	52.5	42	6	4.2	3.4	31
G87	CHAM-8/RUTH-3//ZAIN-2	ICW08-50004-5AP-0AP-0AP-3TR	67	109	65	24.4	49	46	3.5	29	0.94	3.95667	39.7	73	118	79	24.2	49.45	32	7	41	3.96	5.64667	20	62	122	61	24.4	45.7	48	6	4.29	3.2	36
G88	CHAMRAN//SHUHA-8/DUCULA	ICW07-0012-8AP-0AP-0AP-1AP	61.5	105.5	71.5	24.25	47.05	32	3.5	42.5	0.6775	3.99667	36.6	70.5	119.5	82	23.9	52	24	5	58.5	3.69	5.65333	18.5	56	116	62	24.7	52.2	54	7	2.88	4.48	33
G89	CHAMRAN//SHUHA-8/DUCULA	ICW07-0012-4AP-0AP-0AP-1AP	69.5	112	69	24.075	45.625	35	4	45	1.2175	4.11167	38	69.5	112.5	83	24.15	48.15	32	6	40	3	5.65333	21.9	56	114	73	25.4	47.2	48	6	3.72	3.04	39
G90	CHAMRAN//SHUHA-8/DUCULA	ICW07-0012-4AP-0AP-0AP-5AP	70.5	113.5	66.5	25	51.95	41	4	35	1.0575	4.03167	39.4	69.5	114	80	22.95	51.4	28	5	59.5	2.19	5.66	21.3	64	123	61	25.9	50.5	42	6	3.48	4	37
G91	CHAMRAN//SHUHA-8/DUCULA	ICW07-0012-4AP-0AP-0AP-7AP-0KUL	60.5	107	64.5	24.025	48.525	35	3	51	0.94	3.24167	40.1	66.5	112	81.5	22.1	51.95	52	4	83	3.9	5.69333	22.5	53	113	66	25.5	55.1	42	5	3.276	3.44	29
G92	CHAMRAN/4/OPATA/BOW//BAU/3/OPATA/BOW/5/SAMIRA-9	ICW08-50008-21AP-0AP-0AP-1TR	57	104	62.5	23.475	49.55	44	4	37	0.9725	4.7	34.4	67.5	111	76	22.85	50.35	20	5	45.5	1.71	5.69333	21.3	55	114	67	25.7	49.5	48	6	2.916	3.76	38
G93	CHAMRAN/4/OPATA/BOW//BAU/3/OPATA/BOW/5/SAMIRA-9	ICW08-50008-21AP-0AP-0AP-2TR	62	106.5	61.5	24.55	46.825	45	3.5	37	1.135	4.49333	34	71.5	115.5	76.5	23.6	46.35	24	8	52.5	2.4	5.7	18.7	55	116	68	25.1	51.4	42	5	2.73	4.4	32
G94	CHAMRAN/4/OPATA/BOW//BAU/3/OPATA/BOW/5/SAMIRA-9	ICW08-50008-13AP-0AP-0AP-2TR	64.5	109.5	64.5	23.35	48.625	38	3	37	1	3.88333	37.9	68.5	116.5	70.5	22.4	49.75	28	5	61	2.76	5.70667	19	56	116	71	26.1	45.4	36	6	3.216	5.28	32
G95	CMH82A.1294/2*KAUZ//MUNIA/CHTO/3/MILAN/4/AMIR-2	ICW07-0482-0AP-0AP-0AP-6AP-0KUL	67	112.5	74.5	23.175	48.95	37	3.5	51	1.285	4.745	38.4	69	115.5	81.5	23.05	49.25	24	6	52	2.28	5.70667	19.5	58	119	73	24.5	51.5	48	6	3.036	5.72	34
G96	CMH82A.1294/2*KAUZ//MUNIA/CHTO/3/MILAN/4/P1.861/RDWG	ICW07-0480-2AP-0AP-0AP-3AP	60	108.5	67	23.425	48.6	36	3.5	52.5	0.9	4.91333	40.2	68	112.5	82	23.75	50.65	28	5	35.5	2.97	5.71333	19.9	56	117	66	25.1	55	48	5	3	5.12	38
G97	CMH82A.1294/2*KAUZ//MUNIA/CHTO/3/MILAN/4/P1.861/RDWG	ICW07-0480-2AP-0AP-0AP-3AP-0KUL	65.5	109	74	23.675	44.9	32	3	58.5	1.0725	4.02167	40.4	71.5	115	84	23.35	50.3	40	6	72	2.07	5.75333	18.8	55	113	65	25.2	46.7	54	6	2.97	4.8	36
G98	CROC-1/AE.SQUARROSA (205)//MILAN/KAUZ/3/MILAN/PASTOR	ICW07-0615-2AP-0AP-0AP-5AP	70	117	77.5	24.2	49.525	35	3	58.5	1.2975	5.12333	40.9	65	114	84.5	22.25	50.75	28	5	70.5	3.03	5.80667	21.7	63	121	63	25.5	48.7	48	6	2.256	4.52	38
G99	CROC-1/AE.SQUARROSA (205)//MILAN/KAUZ/3/MILAN/PASTOR	ICW07-0615-8AP-0AP-0AP-1AP	64.5	112	71	23.975	47.475	39	4	37	1.1275	4.04	40.4	67	111	72	23.65	51.95	28	5	54	2.25	5.82667	17.4	56	115	62	25.9	48.9	36	4	3.6	6.16	30
G100	CROC-1/AE.SQUARROSA (205)//MILAN/KAUZ/3/MILAN/PASTOR	ICW07-0615-7AP-0AP-0AP-4AP	67.5	108.5	69.5	24.15	45.475	40	4.5	48.5	0.7875	4.18833	41.4	66	111	76.5	23.25	47	36	4	52.5	2.94	5.85333	18.7	55	113	64	26.6	49.3	42	5	3.096	4.36	36
G101	DAJAJ-5/4/CHEN/AEGILOPS SQUARROSA (TAUS)//BCN/3/KAUZ	ICW07-0226-1AP-0AP-0AP-3AP-0KUL	65.5	109	77	24.775	48.65	45	3.5	40.5	1.22	4.445	39.6	72	114.5	82.5	22.65	49.05	32	6	46.5	1.95	5.86667	21.2	53	112	65	25.2	45.4	48	6	3.66	5.8	35
G102	DAJAJ-5/4/CHEN/AEGILOPS SQUARROSA (TAUS)//BCN/3/KAUZ/5/WBLL1*2/KIRITATI	ICW08-50152-2AP-0AP-0AP-4TR	63	108	82	24.25	47.075	41	3.5	37	1.095	3.83833	42.2	66	113.5	82	24.15	49.05	28	6	66	2.28	5.87333	22.5	60	119	76	25.1	53.8	42	6	3.36	4.12	34
G103	DAJAJ-5/4/CHEN/AEGILOPS SQUARROSA (TAUS)//BCN/3/KAUZ/5/WBLL1*2/KIRITATI	ICW08-50152-1AP-0AP-0AP-4TR	64.5	108.5	75.5	23.825	48.75	37	3.5	37.5	1.254	4.00333	39.7	69	119	89.5	23.35	50.6	28	5	63.5	2.4	5.88	18	61	121	71	25.7	48.3	48	7	3.81	3.8	33
G104	DAJAJ-5/4/CHEN/AEGILOPS SQUARROSA (TAUS)//BCN/3/KAUZ/5/WBLL1*2/KIRITATI	ICW08-50152-1AP-0AP-0AP-3TR	65.5	109.5	69	23.725	46	34	4	45	1.11	4.265	36.7	68	115.5	82.5	22.6	50.25	48	6	52	3.42	5.88667	19.7	60	119	62	24.2	51.8	54	8	3.69	3.24	36
G105	DAJAJ-5/4/CHEN/AEGILOPS SQUARROSA (TAUS)//BCN/3/KAUZ/5/WBLL1*2/KIRITATI	ICW08-50152-1AP-0AP-0AP-2TR	64.5	107	72	23.925	50.65	33	4	34	0.915	3.46	38.3	69.5	114.5	85.5	22.35	50.6	24	6	55	2.85	5.92	22.8	58	116	66	25.8	49.1	42	7	2.64	3.84	31
G106	DAJAJ-5/ETBW 4922//NEJMAH-9	ICW08-50154-2AP-0AP-0AP-3TR	70	108	68	23.65	45.65	38	3.5	53.5	1.38	3.62333	38.4	69.5	113.5	79.5	22.65	44	40	5	48	2.25	5.95333	18.3	64	125	53	25.3	50.2	42	5	3.096	4.24	37
G107	DAJAJ-5/ETBW 4922//NEJMAH-9	ICW08-50154-2AP-0AP-0AP-2TR	75	99.5	59.5	24.05	46.7	41	3	55.5	1.13	4.09833	37	66.5	112	87	22.25	47.2	28	6	59	3.66	5.97333	19.2	60	120	62	24.9	52.1	48	6	3.51	4.28	42
G108	DEBEIRA//MILAN/PASTOR	ICW07-0014-1AP-0AP-0AP-5AP	62	109	80.5	24.675	47.025	45	4	46.5	1.1	5.125	33.7	71.5	114.5	85.5	22.7	51.1	28	6	70.5	3.18	5.99333	17.8	56	116	61	25.8	56	36	5	3.3	4.04	35
G109	DEBEIRA//SHUHA-8/DUCULA	ICW07-0016-4AP-0AP-0AP-3AP	62.5	106.5	64	23.525	48.45	42	3	55	1.1175	4.65333	36.5	67.5	115.5	76	23	52.35	48	5	54	1.86	6	19.7	61	120	70	24.6	51.7	42	6	3.18	3.92	35
G110	DEBEIRA//SHUHA-8/DUCULA	ICW07-0016-4AP-0AP-0AP-7AP	70	110.5	66.5	24.025	53.05	45	3.5	38.5	0.9775	4.20833	39	72	115.5	80.5	23.7	54	28	4	61.5	2.61	6	20.3	63	121	50	25.4	50.8	36	4	3.948	3.24	37
G111	DEBEIRA//SHUHA-8/DUCULA/3/PASTOR/SERI//PFAU	ICW08-50013-2AP-0AP-0AP-2TR	68	108	73	23.75	49.2	47	3.5	48.5	0.955	3.83167	39.5	70.5	117	80	23.1	53.9	24	4	59	2.25	6.02	19.1	58	118	65	25.8	49.2	36	5	3.15	3.08	34
G112	DEBEIRA//SHUHA-8/DUCULA/3/PASTOR/SERI//PFAU	ICW08-50013-2AP-0AP-0AP-3TR	67	107.5	75	23.675	44.7	38	4	38.5	1.18	4.48667	41.3	74	118.5	81	22.4	48.25	28	4	64	4.11	6.02667	19	56	115	67	25.5	50	48	7	4.236	4.28	28
G113	DEBEIRA//SHUHA-8/DUCULA/3/PASTOR/SERI//PFAU	ICW08-50013-8AP-0AP-0AP-2TR	67	105.5	68.5	23.325	45.225	40	3.5	40.5	1.345	4.07667	42.2	69.5	115	74	22.85	48.2	28	5	83.5	3.42	6.06667	15.7	61	123	62	25.8	48.6	42	5	4.05	3.4	29
G114	DEBEIRA//SHUHA-8/DUCULA/3/PASTOR/SERI//PFAU	ICW08-50013-2AP-0AP-0AP-5TR	67.5	109.5	76	23.575	44.675	44	4	51.5	1.0975	4.55167	37.6	70	116	76	22.35	47.6	24	6	51.5	2.67	6.08667	19.1	61	123	58	26.3	48.9	36	5	4.32	4.36	34
G115	DEBEIRA//SHUHA-8/DUCULA/3/PASTOR/SERI//PFAU	ICW08-50013-1AP-0AP-0AP-1TR	65	110.5	80.5	23.525	50.175	43	3.5	35.5	1.3375	4.01333	40.3	70.5	115	76.5	23.85	51.85	32	4	62.5	2.52	6.08667	20.4	57	116	69	25.7	52.9	42	5	3.45	2.8	32
G116	DEBEIRA//SHUHA-8/DUCULA/3/PASTOR/SERI//PFAU	ICW08-50013-8AP-0AP-0AP-3TR	68.5	111	70	23.875	46.65	43	3.5	55.5	1.475	4.36833	37.9	68.5	112.5	81.5	22.7	46.45	40	7	69.5	3.15	6.14667	20.7	55	116	70	25.4	52.9	42	6	3.84	3.92	31
G117	DEBEIRA//SHUHA-8/DUCULA/3/PASTOR/SERI//PFAU	ICW08-50013-1AP-0AP-0AP-3TR	68	107.5	74	23.9	46.35	44	3.5	42	1.05	3.75	36.7	67	110.5	72	23.95	47.2	32	4	55	2.91	6.19333		61	122	63	25.3	46.2	36	5	2.82	4.28	36
G118	DEBEIRA//SHUHA-8/DUCULA/3/PASTOR/SERI//PFAU	ICW08-50013-2AP-0AP-0AP-4TR	69	106.5	68.5	23.775	45.95	42	3.5	43.5	1.485	4.55	45.8	68	115	80	22.8	51.85	40	6	66.5	3.36	6.2	18.3	55	113	59	25.4	50.8	42	5	3.93	3.8	38
G119	DEBEIRA/ETBW 4922//SKAUZ/BAV92	ICW08-50012-22AP-0AP-0AP-4KUL-010DZ	64	107.5	70.5	24.2	52.475	43	3.5	41.5	1.0675	3.79833	39.7	70.5	120	79.5	22.6	47.25	28	5	97.5	4.14	6.20667	20.6	61	122	74	24.8	53.6	48	6	3.21	3.72	34
G120	DEBEIRA/ETBW 4922//SKAUZ/BAV92	ICW08-50012-22AP-0AP-0AP-5KUL-010DZ	64	108.5	60.5	24.175	48.75	42	4	31	0.86	4.00667	37.5	74	119	88.5	22.35	51.2	36	4	37	2.55	6.22	19.6	61	122	65	24.9	55.8	36	5	3.51	4.08	35
G121	DEZ//MILAN/PASTOR/3/PASTOR/SERI//PFAU	ICW08-50017-11AP-0AP-0AP-3TR	66	106	68	24.5	45.975	41	3.5	51	0.99	3.58833	39.1	65	110	81	23.85	46.95	32	7	71	4.8	6.26	20.9	56	117	63	26.3	50.2	42	6	4.08	3.32	31
G122	DURRA-2/ETBW 4920//CHIL-1/SHUHA-1	ICW08-50444-2AP-0AP-0AP-4TR	62.5	107	65	24.525	49.425	39	3.5	52	1.14	3.14167	42.5	68	114	84.5	23.05	54.2	24	7	51	3.75	6.26	22.1	58	118	66	25.6	53.8	36	5	3.12	4.16	29
G123	DURRA-2/TAZA-2	ICW07-0716-1AP-0AP-0AP-3AP	70	109	68.5	24.4	48.925	42	3.5	52	0.885	4.045	38	71.5	114	84.5	23.4	50.45	28	7	70.5	2.34	6.28	19.7	63	123	61	26.1	50.9	36	4	3.33	4.56	38
G124	DURRA-2/TAZA-2	ICW07-0716-1AP-0AP-0AP-6AP	69	112.5	76	24.05	49.65	41	4	32	1.115	4.71833	39.6	65.5	114	70	23.05	49.35	24	4	59.5	2.4	6.3	17.9	62	121	69	25.3	47.8	42	5	4.5	4.08	36
G125	DURRA-6/SHAMIEKH-7	ICW07-0719-3AP-0AP-0AP-2AP	68	110	76	23.7	48.575	45	3.5	35.5	1.22	4.92833	43.4	72	116.5	74.5	22.1	53.3	24	4	72.5	3.15	6.34667	20.3	62	122	59	26.1	48	36	4	3.42	5.16	35
G126	EALME4SA - 464/7/KEA/TAN/4/TSH/3/KAL/BB//TQFN/5/PAVON/6/SW89.3064/8/WBLL1*2/BRAMBLING	ICW08-50392-16AP-0AP-0AP-4TR	68	108	78.5	23.575	45.175	34	3	23.5	1.3025	4.27	42.4	70	114.5	74	22.3	48	36	5	64	3.42	6.36667	20.3	55	113	81	25.8	43.3	36	4	3.876	5.28	39
G127	EALME4SA - 464/FLAG-3/5/HUITES/4/CS/TH.SC//3*PVN/3/MIRLO/BUC	ICW08-50393-12AP-0AP-0AP	68	115	76	23.275	51.9	41	4	53.5	1.175	4.25833	41.3	67	112.5	77.5	23.8	52.25	24	8	44.5	3.24	6.36667	19.4	63	123	58	26.4	53.2	48	7	3.39	5.8	37
G128	EALME4SA -167/FLAG-1/3/PASTOR/SERI//PFAU	ICW08-50391-14AP-0AP-0AP-1KUL-010DZ	72	112.5	61	23.175	47.625	38	4.5	45	1.06	4.22	38.8	70.5	114.5	72.5	23.55	50.6	28	7	72.5	3.12	6.4	19.4	65	123	50	26.1	46.8	42	5	4.02	4.6	34
G129	FARAH-7/ETBW 4919	ICW07-0338-0AP-0AP-0AP-3AP-0KUL	67	112	76	24.525	49.15	42	4	31	0.9475	4.77167	39.6	70.5	119.5	82.5	22.9	52.7	44	4	51.5	1.83	6.40667	21.1	64	123	60	25.7	48.9	36	4	3.51	4.36	32
G130	FARAH-7/SHAMIEKH-4	ICW07-0340-5AP-0AP-0AP-2AP	67	111.5	73	24.225	45.95	38	3.5	34.5	1.13	4.8	37.3	72.5	116	86	23.15	46.2	28	5	81	4.89	6.42667	18.5	57	116	61	26.3	43.3	36	5	2.85	4.88	35
G131	FARAH-7/SHAMIEKH-4	ICW07-0340-5AP-0AP-0AP-4AP	66	111.5	78	24.5	49.2	46	3.5	31	1.3275	4.86	39.1	70	115.5	81	24.25	50.9	20	4	68.5	2.37	6.47333	20.8	58	119	72	25.1	46.3	42	6	3.33	3.68	36
G132	FARIS-17//PFAU/MILAN	ICW07-0344-1AP-0AP-0AP-3AP-0KUL	62.5	108	67	24.25	46.575	39	3.5	43.5	1.1525	3.92667	38.8	69	113	81.5	22.45	48.9	24	9	61.5	2.67	6.54667	19.4	59	119	79	25.8	47.9	48	6	3.54	4.52	37
G133	FARIS-17/ETBW 4920/3/MUNIA/CHTO//MILAN	ICW08-50230-2AP-0AP-0AP-4TR	68	108.5	70.5	24.85	49.1	45	3	43.5	1.1075	4.21333	35.4	73	116.5	78	21.9	54.15	24	7	67.5	2.55	6.55333	19.9	61	122	64	25	49.3	42	5	3.36	3.36	33
G134	FARIS-6//PFAU/MILAN	ICW07-0787-3AP-0AP-0AP-6AP-0KUL	67	112	76.5	23.85	46.775	45	3.5	34.5	1.06	4.14167	40.3	67.5	113.5	73.5	22.9	50.45	36	4	72	2.79	6.59333	19	62	123	68	25.3	48.6	36	5	3.78	4.32	34
G135	FARIS-6//PFAU/MILAN	ICW07-0787-3AP-0AP-0AP-5AP	67	110.5	75.5	24.25	45.25	39	2.5	53	1.075	3.80667	36.1	75	116	79.5	23	47.45	28	4	61	2.76	6.60667		60	121	64	25.6	44.2	48	6	3.66	3.76	38
G136	FARIS-6//PFAU/MILAN	ICW07-0787-3AP-0AP-0AP-6AP	83.5	111	62.5	24.875	45.5	38	3	46	1.2775	4.41	39.1	68	114	82	22.5	46.5	44	5	84.5	3	6.65333	18.1	62	120	66	25.2	43.5	42	6	3.336	5.12	30
G137	FAYEQ-2/3/NESMA*2/14-2//2*SAFI-3	ICW08-00131-4AP-0AP-0AP	77.5	97.5	65	24.45	44.75	44	3	43.5	1.3275	3.78167	36.1	67	115.5	79	22.5	47.05	28	7	64	3.96	6.68	18.3	53	112	60	24.7	46.4	36	5	3.57	4.44	33
G138	FAYEQ-2/3/NESMA*2/14-2//2*SAFI-3	ICW08-00131-4AP-0AP-0AP-2KUL-010DZ	59	92.5	74.5	23.4	47.4	40	3.5	35	1.1575	4.78833	38.3	65.5	115	79	24	47.1	24	5	44	2.01	6.68667		53	111	73	26.8	47.6	42	6	2.58	3.24	32
G139	FAYEQ-2/3/NESMA*2/14-2//2*SAFI-3	ICW08-00131-5AP-0AP-0AP-4KUL-010DZ	66	106.5	74	22.975	47.525	46	4	39	1.165	4.95167	43	69	121	103.5	21.7	49.75	24	4	61	3.54	6.72667		55	115	62	26.4	48.4	42	6	3.72	3	35
G140	FILIN/3/CROC-1/AE.SQUARROSA (205)//KAUZ/4/FILIN/5/VEE/MJI//2*TUI/3/PASTOR/6/ASEEL-4	ICW08-00163-8AP-0AP-0AP-1TR	69	111.5	77.5	22.925	49.25	40	3.5	56.5	1.5025	3.055	38.7	76	119	85	22.7	53.45	28	6	78.5	4.35	6.79333		61	122	70	26.2	49.7	36	5	3.3	4.96	37
G141	FILIN/3/CROC-1/AE.SQUARROSA (205)//KAUZ/4/FILIN/5/VEE/MJI//2*TUI/3/PASTOR/6/ASEEL-4	ICW08-00163-8AP-0AP-0AP-3TR	67	107.5	74	23.95	49.4	32	3.5	47	1.7	4.57833	41	68	116	73.5	22.45	49.05	28	5	80	3.06	6.81333	20.7	61	123	63	25.8	49.4	48	6	3.06	3.64	42
G142	FILIN/3/CROC-1/AE.SQUARROSA (205)//KAUZ/4/FILIN/5/VEE/MJI//2*TUI/3/PASTOR/6/SHUHA-4/CHAM-12	ICW08-00191-1AP-0AP-0AP-5KUL-010DZ	69	113	79.5	23.5	51.15	46	3	70.5	1.2625	4.465	43.4	68	113.5	78.5	23.05	50.25	32	5	66.5	2.79	6.85333		61	123	68	26.3	47.9	42	5	3.21	4.4	33
G143	FILIN/3/CROC-1/AE.SQUARROSA (205)//KAUZ/4/FILIN/5/VEE/MJI//2*TUI/3/PASTOR/6/SHUHA-4/CHAM-9	ICW08-00191-1AP-0AP-0AP-2KUL-010DZ	72	113.5	70	24.1	46.125	41	4	56.5	1.115	4.59667	38.4	69	112.5	83.5	22.4	54.1	36	7	52.5	3.48	6.88667	19.7	56	115	61	26.8	48.5	36	4	2.94	4.44	30
G144	FLORKWA-2/85 Z 1284//ETBW 4920/3/LOULOU-18	ICW08-50436-3AP-0AP-0AP-4KUL-010DZ	69.5	112	77.5	23.825	47.85	38	4	62	1.56	4.90833	40.3	71.5	115.5	85	23.6	44.8	28	6	70.5	2.73	6.89333	21.3	59	118	55	26.6	47.4	48	7	2.67	4.28	37
G145	FLORKWA-2/BAASHA-25//BUSHRAA-5	ICW08-50130-8AP-0AP-0AP-4TR	68.5	112.5	78	22.275	44.175	50	4	63.5	1.125	4.60833	40.3	70.5	111	85	23.7	47.75	32	5	52.5	3.42	6.9	18.3	62	121	69	26.3	47.1	42	6	3	2.92	35
G146	FOW-1/SHUHA-8//ETBW 4921/3/MILAN/PASTOR	ICW08-50440-10AP-0AP-0AP-3TR	61	105.5	75	23.3	45.7	37	3.5	53.5	1.0875	5.75667	38.7	69.5	116.5	90	22.65	48.05	28	5	63.5	2.46	6.94		55	113	58	25.8	45.9	48	7	2.856	2.88	27
G147	FOW-1/SHUHA-8//ETBW 4921/3/MILAN/PASTOR	ICW08-50440-10AP-0AP-0AP-5TR	61.5	105.5	79.5	22.9	48	40	3.5	49	1.31	6.16833	41.2	67.5	113	98	21.8	51.65	36	5	60	2.88	6.95333	21.6	59	117	67	26.2	50.9	42	6	1.65	4.72	38
G148	FOW-1/SHUHA-8//ETBW 4921/3/MILAN/PASTOR	ICW08-50440-10AP-0AP-0AP-1TR	65.5	107.5	77.5	22.8	47.8	35	3	41.5	1.26	5.42	38.3	69	114.5	81	23.2	52.1	44	4	68	2.34	6.96667	21.4	56	118	73	26.2	47.5	42	6	2.22	3.96	37
G149	GALVEZ/WEAVER/3/VORONA/CNO79//KAUZ/4/MILAN//PSN/BOW	ICW07-0151-6AP-0AP-0AP-3AP-0KUL	71	112	70.5	24.025	51.35	40	4	45	1.23	4.55833	42.6	70.5	112.5	79	22.45	50.3	32	5	56.5	3.54	6.96667	20	61	124	71	26.8	45.8	48	8	4.896	4.48	32
G150	GALVEZ/WEAVER/3/VORONA/CNO79//KAUZ/4/MILAN//PSN/BOW	ICW07-0151-6AP-0AP-0AP-1AP-0KUL	68	106.5	69	23.1	47.35	41	3.5	31.5	1.3375	4.46	37.8	72	116	82.5	23.1	45.55	24	4	62	2.52	6.98		61	122	70	25.8	46.1	54	7	5.376	4.04	32
G151	GALVEZ/WEAVER/3/VORONA/CNO79//KAUZ/4/MILAN//PSN/BOW	ICW07-0151-2AP-0AP-0AP-6AP	62.5	106	63.5	23.725	46.95	40	4	45.5	1.1525	4.53667	40.4	72	115	73	23.85	51.8	32	5	57.5	4.5	6.99333	21.3	55	114	70	25.7	41.9	48	6	4.14	5.4	33
G152	GALVEZ/WEAVER/3/VORONA/CNO79//KAUZ/4/MILAN//PSN/BOW	ICW07-0151-6AP-0AP-0AP-4AP-0KUL	72	113	66.5	24.025	48.175	37	3.5	43.5	1.2075	4.34	35.7	70.5	112.5	89.5	23.75	47.95	32	5	52.5	3.36	7.01333		61	122	66	25.3	53.9	36	7	3.69	4.2	35
G153	GEMMEIZA-10/SHAMISS-3	ICW08-00042-2AP-0AP-0AP-4TR	73.5	109	70.5	24.225	46.825	37	3.5	52.5	1.125	4.05333	39.2	68	112	81	22.35	50.4	56	5	57.5	3.18	7.05333	19.2	61	122	71	26.9	50.2	48	7	3.63	3.92	35
G154	GEMMEIZA-10/SHAMISS-3	ICW08-00042-2AP-0AP-0AP-3TR	67	110.5	70	23.625	48.5	38	3	34.5	1.1475	4.02667	40.7	70	112.5	77.5	23.6	54.5	28	7	33	4.02	7.05333	21.3	56	116	69	26.8	53.8	42	6	4.62	3.88	34
G155	GOUMRIA-3//PFAU/MILAN	ICW07-0581-4AP-0AP-0AP-3AP-0KUL	73	118	73	23.575	48.675	46	4	35.5	0.98	4.71333	39.6	71.5	115.5	83.5	22.25	46.93	36	4	79	3.96	7.08	20.5	61	122	70	26.6	53.5	42	7	4.41	4.56	34
G156	GOUMRIA-3//PFAU/MILAN	ICW07-0581-4AP-0AP-0AP-4AP	65	111.5	72.5	23.775	48.725	35	3.5	44	1.2175	2.47667	43.5	67	112.5	82.5	22.35	48.75	28	4	47	3.18	7.10667	19.2	60	121	59	25.8	54.6	48	7	3.57	4.88	36
G157	GOUMRIA-3//PFAU/MILAN	ICW07-0581-4AP-0AP-0AP-6AP	68	117	76.5	23.475	52.375	35	4	44	1.19	3.905	38	65.5	115.5	87	22	52.15	28	5	58	1.65	7.17333	18.7	61	121	60	26.1	48	42	6	3.09	3.76	33
G158	GOUMRIA-3//PFAU/MILAN/3/QADANFER-4	ICW08-50354-2AP-0AP-0AP	69	117	81	23.425	43.325	32	4	39	1.27	4.09567	40	72	118.5	82	23.65	48.05	36	9	66	4.14	7.20667	18.8	62	122	65	26.6	48.4	36	6	3.576	4.96	39
G159	HADIAH-14/QAMAR-1	ICW07-0229-2AP-0AP-0AP-5AP	72	118	80.5	23.175	46.1	38	4	51	1.48	4.5	36.6	66	111	71.5	22.25	51.05	40	5	39	2.34	7.21333	18.6	65	126	59	28.5	46.4	36	5	3.6	4.88	40
G160	HADIAH-14/QAMAR-1	ICW07-0229-2AP-0AP-0AP-2AP	69	111.5	79	23	44.075	40	3.5	27.5	1.73	5.22	37.1	62.5	113	87.5	21.75	45.45	44	8	45.5	3.48	7.24	20.3	62	123	60	26.5	44.8	36	4	3.54	4.52	32
G161	HAMAM-4/FAISAL-1	ICW07-0490-0AP-0AP-0AP-4AP	70.5	108	70.5	23.025	46.6	38	3.5	30	1.195	2.83	43.4	70	115	84	23.1	48.5	32	6	51.5	2.7	7.24	20	63	122	50	27	48.2	42	5	2.73	4.04	34
G162	HUBARA-1//ACHTAR/INRA 1764	ICW07-0258-1AP-0AP-0AP-7AP	66	107.5	74.5	23.7	41.325	35	3.5	39	1.1575	2.65833	40.6	68.5	113.5	82	22.5	51.65	32	4	63.5	4.32	7.24667	19.6	60	121	69	26.3	46.9	42	6	3.156	3.92	32
G163	HUBARA-1//ACHTAR/INRA 1764/7/CHAM-8/6/SAKER'S'/5/RBS/ANZA/3/KVZ/HYS//YMH/TOB/4/BOW'S'	ICW08-50178-3AP-0AP-0AP-4TR	62	104	61	24.825	45.375	41	3.5	60.5	1.0925	3.695	40.2	69.5	120.5	84	22.3	52.05	28	6	59.5	2.46	7.28667	19.7	61	122	50	27.1	53.5	36	4	2.85	2.76	32
G164	HUBARA-1/4/PASTOR//MILAN/KAUZ/3/URES/JUN//KAUZ	ICW07-0586-1AP-0AP-0AP-2AP-0KUL	67.5	104.5	68.5	24.025	49.5	43	3	26.5	0.8	3.48333	35.5	69.5	114.5	79	22.6	49.25	28	6	89	3.21	7.3	17.7	63	123	56	26.6	49.3	36	5	3.48	2.72	34
G165	HUBARA-1/5/KAUZ/3/MYNA/VUL//BUC/FLK/4/MILAN	ICW07-0256-7AP-0AP-0AP-2AP	63	104	65	24.95	47.85	37	4	41	0.9975	2.83	37.1	70	114	80	23.85	51.9	28	4	58	2.4	7.31333	17.4	62	122	52	26.2	54.9	42	5	3.096	2.68	32
G166	HUBARA-1/5/KAUZ/3/MYNA/VUL//BUC/FLK/4/MILAN	ICW07-0256-7AP-0AP-0AP-3AP	54.5	92.5	66.5	23.975	47.375	32	3	24.5	0.8825	4.16333	35.4	72	115	85	23.1	53.6	28	7	53.5	2.85	7.31333		58	116	58	25.8	51	48	7	3.54	2.8	33
G167	HUBARA-1/5/KAUZ/3/MYNA/VUL//BUC/FLK/4/MILAN	ICW07-0256-4AP-0AP-0AP-1AP	73	107	59	24.275	46.075	34	3.5	40	0.925	3.46167	36.4	73	115.5	87.5	23.65	45.9	28	5	55	2.73	7.36	18.1	64	123	57	25.9	50.2	36	5	3.12	3.76	35
G168	HUBARA-1/5/KAUZ/3/MYNA/VUL//BUC/FLK/4/MILAN	ICW07-0256-4AP-0AP-0AP-1AP-0KUL	63.5	106	60	23.925	42.375	36	3	41	1.0925	5.41667	37.5	70	116	78.5	24.35	52.35	28	5	59	4.5	7.37333	17.5	60	118	57	25.5	47	36	4	2.91	4.56	34
G169	HUBARA-1/5/KAUZ/3/MYNA/VUL//BUC/FLK/4/MILAN	ICW07-0256-4AP-0AP-0AP-4AP	64.5	109.5	69	22.825	48.8	41	4	68	1.1325	4.66667	39.2	67.5	113.5	79.5	22.45	52.85	36	5	63	3.21	7.38667	19.5	63	122	55	26.7	52.6	36	5	3.45	5.2	33
G170	HUBARA-1/ETBW 4921	ICW07-0257-0AP-0AP-0AP-2AP-0KUL	67	108	73	22.775	47.225	38	3	53.5	1.5125	4.96667	41.8	66	113.5	89.5	23.6	51.15	24	4	59.5	3.36	7.38667	23.2	61	122	55	25.7	48.7	42	6	4.47	4.56	33
G171	HUBARA-1/ETBW 4921	ICW07-0257-0AP-0AP-0AP-1AP-0KUL	69.5	116	70	22.875	46.275	40	4	56.5	1.18	4.24	40.2	68.5	114	79	23.15	50.05	28	8	48.5	2.46	7.42667	19.9	62	122	44	27.3	55.6	36	4	2.76	5.2	34
G172	HUBARA-1/ETBW 4921	ICW07-0257-0AP-0AP-0AP-4AP	67	113.5	72.5	22.9	48.725	39	4	45	1.1575	5.10333	38	67	112.5	81.5	23.15	53.05	44	4	52	3.84	7.44	18.9	60	118	61	26.3	51	42	5	3.72	5.16	37
G173	HUBARA-1/ETBW 4921	ICW07-0257-0AP-0AP-0AP-3AP-0KUL	66	115	82.5	23.1	48.6	34	3.5	30.5	1.385	5.09167	37.7	69	115	77	22.75	49.55	28	4	47.5	3.51	7.55333	19.2	60	120	62	26.3	53.3	42	6	3.18	5.28	38
G174	HUBARA-13//ACHTAR/INRA 1764	ICW07-0253-2AP-0AP-0AP-3AP	65	111.5	78.5	23.325	46.275	33	4	43.5	1.2	4.79333	39	73	116	81	22.3	46.65	40	6	61.5	4.26	7.56667		59	119	68	25.8	56.2	48	6	2.31	5.04	31
G175	HUBARA-13//ACHTAR/INRA 1764	ICW07-0253-2AP-0AP-0AP-5AP	71	113.5	70	23.625	46.825	46	4	43	1.3	4.44333	36.6	62.5	109	75	22.75	49.55	44	5	68.5	4.17	7.56667	17.9	65	126	54	26.5	51.6	36	6	3.06	3.92	33
G176	HUBARA-13/4/PASTOR/3/VEE#5//DOVE/BUC/5/FAYEQ-1	ICW08-50175-1AP-0AP-0AP-3TR	63.5	105	73	23.7	47.675	35	3.5	45.5	0.8325	4.28	40.6	68	113.5	82	22.65	47.4	48	4	88	4.32	7.59333		54	113	67	25.9	46.5	42	6	3.396	3.76	33
G177	HUBARA-13/4/PASTOR/3/VEE#5//DOVE/BUC/5/FAYEQ-1	ICW08-50175-1AP-0AP-0AP-1TR	73	112.5	68	23.35	49.5	49	4.5	49	1.335	4.05333	37.9	71	115	77	23.9	53.2	28	4	66	3.96	7.59333	16.3	62	121	58	26.7	49.9	36	4	3.09	3.68	37
G178	HUBARA-13/ETBW 4919//KINGBIRD	ICW08-50173-3AP-0AP-0AP-1TR	71	110.5	73	23.575	47.925	43	3.5	46.5	0.7625	4.18	36.5	68.5	117.5	91.5	21.85	53.25	28	5	56	3.09	7.66667	19.3	62	121	68	26.4	51.5	42	5	3.51	3.2	33
G179	HUBARA-13/ETBW 4919//KINGBIRD	ICW08-50173-3AP-0AP-0AP-3TR	63.5	109	74	24.375	48.075	32	3	53.5	0.8425	4.075	36.5	70.5	116	80	23.7	49.6	32	5	54	5.31	7.67333	20.9	56	115	63	29.2	51.1	48	6	3.6	2.96	33
G180	HUBARA-16//RDWG/MILAN	ICW07-0592-9AP-0AP-0AP-7AP	66	111.5	71.5	24.95	48.175	35	3.5	46.5	0.7325	4.11833	34.7	71	113	85.5	22.55	50.95	32	5	63.5	5.16	7.68667	19.6	53	112	76	29.7	48.6	48	6	3.72	3.6	35
G181	HUBARA-16//RDWG/MILAN	ICW07-0592-9AP-0AP-0AP-3AP-0KUL	61.5	105	76.5	24.975	42.025	33	3.5	41.5	0.77	3.865	37.8	70	115	77	23	52.7	32	4	61	5.04	7.72667	21.7	60	122	76	25.2	46	54	7	3.456	3.04	39
G182	HUBARA-16//RDWG/MILAN	ICW07-0592-9AP-0AP-0AP-4AP	66	105	74	24.9	47.225	38	3	30	0.7775	4.315	36.3	68	114.5	79.5	22.45	50.25	28	5	86	3.42	7.8	18.2	60	122	71	25.7	42.2	30	6	4.29	3.36	35
G183	HUBARA-5//PFAU/MILAN	ICW07-0583-6AP-0AP-0AP-5AP	67	107	67	24.875	47.875	35	3	43	0.855	4.58667	38.7	70	110.5	79.5	22.05	51.5	44	6	69	3.18	7.82667	18.6	60	122	59	26.6	53	30	5	2.13	3	33
G184	HUBARA-5//PFAU/MILAN	ICW07-0583-6AP-0AP-0AP-1AP	68	111	65.5	24.075	47.15	37	3.5	43	0.81	4.46833	36.6	70.5	113.5	70.5	24	47.15	28	4	53.5	3.42	7.85333	18.6	57	117	68	26.6	60	30	6	1.98	3.56	43
G185	HUBARA-5/3/NESMA*2/261-9//FIRETAIL	ICW07-0248-2AP-0AP-0AP-4AP	68	111	78.5	23.775	51.35	38	4	38	0.6725	4.945	42.7	72	115	73	23.25	50.2	28	7	59.5	3.51	7.88667	20.3	61	121	72	26.3	50.3	36	7	4.59	3.96	30
G186	INQALAB91*2/TUKURU//MILAN/PASTOR	ICW07-0608-4AP-0AP-0AP-2AP	69	112.5	80	24.2	47.25	38	4	41	1.2125	5.135	38.9	66.5	114.5	84	22.2	53.2	32	7	70.5	2.31	8.02667	19	62	122	70	26	50.7	36	5	4.68	3.84	37
G187	INQALAB91*2/TUKURU//MILAN/PASTOR	ICW07-0608-4AP-0AP-0AP-3AP	70	108.5	64	24.55	50.8	41	4	45	0.9075	4.74333	37.9	72.5	114.5	80.5	21.9	45.9	32	4	79.5	4.56	8.12	18.4	60	118	61	26.6	54.7	30	5	3.21	3.28	35
G188	JAWAHIR-10//SHUHA-8/DUCULA	ICW07-0295-1AP-0AP-0AP-2AP	67.5	109.5	73	24.175	50.475	39	4	44	0.8	3.98	37.3	71	115.5	84	23.4	50.55	28	5	55.5	3.45	8.20667	19.5	60	119	61	26.2	46.2	30	4	3.18	3.88	38
G189	JAWAHIR-10//SHUHA-8/DUCULA	ICW07-0295-1AP-0AP-0AP-3AP	68	110.5	79	23.925	51	35	4	37.5	0.9675	4.04	38.6	72.5	115	95.5	22.6	53.85	44	4	51	3.72	8.22	19.8	62	122	61	26.6	52.5	30	5	2.82	2.96	32
G190	JAWAHIR-10/ETBW 4922	ICW07-0294-0AP-0AP-0AP-5AP	66	111.5	80.5	22.375	51.95	38	4.5	48	0.9425	4.115	39.4	73	115	77	23.45	50.85	32	5	56	5.4	8.32667	19.6	64	122	55	26.1	58	42	6	3.33	3.44	36
G191	JAWAHIR-10/ETBW 4922	ICW07-0294-0AP-0AP-0AP-2AP	69.5	112	75	24.475	49.075	40	4	35	0.9275	3.06833	38.6	70	115	70.5	23.3	49.3	36	8	79	2.82	8.38667	18.4	64	123	63	26	55.8	36	5	3.42	3.24	33
G192	JAWAHIR-2//MILAN/DUCULA	ICW07-0279-8AP-0AP-0AP-1AP	66	108	74	24	48.15	39	3.5	27	0.9125	3.895	37.5	66.5	112	75	21.95	51.8	28	7	53.5	3.39	8.44667	23	61	122	64	26.3	52.3	42	6	3.516	4.36	28
G193	JAWAHIR-2//MILAN/DUCULA	ICW07-0279-6AP-0AP-0AP-3AP-0KUL	67.5	108	78	24.9	48.2	39	3.5	34.5	1.1875	3.83333	37.4	69	112.5	84.5	23	55.35	28	8	56.5	5.16	8.54667	19.9	89	120	76	25.3	48.2	48	7	3.69	4.4	37
G194	JAWAHIR-6/ETBW 4921	ICW07-0285-0AP-0AP-0AP-3AP	60.5	106	80.5	25.15	49.225	33	2.5	31.5	0.8825	4.16667	37	68	111	84	23.6	50.45	36	5	39	5.4	8.60667	14.4	60	119	72	26.3	48.1	42	6	3.36	4.16	43
G195	JAWAHIR-9/ETBW 4920	ICW07-0528-0AP-0AP-0AP-4AP-0KUL	62.5	105.5	68	24.925	48.75	38	3	55	0.86	3.55167	34.3	70	114.5	85	22.3	53.1	32	5	59.5	3.45	8.64667	16.4	63	121	54	28.6	53	36	5	3.39	4.72	35
G196	JAWAHIR-9/ETBW 4920	ICW07-0528-0AP-0AP-0AP-6AP	69.5	104.5	59	25.125	47.1	42	3	40.5	0.9775	4.57	33.8	65	110	72.5	22.7	45.45	40	8	51.5	3.78	8.70667	18	62	121	54	25.7	53	36	5	3.42	4.44	33
G197	JAWAHIR-9/QAMAR-1	ICW07-0527-1AP-0AP-0AP-5AP	63.5	104	63.5	25.075	49.45	37	3	39	0.6175	3.73833	39.2	72	116	81	23.5	51.6	36	7	45	3.81	8.87333		62	122	55	25.7	51.2	30	4	2.49	5.72	37
G198	KA/NAC//SERI/RAYON/3/GOUMRIA-14	ICW08-00244-3AP-0AP-0AP-3TR	59.5	103	68	24.875	48.275	45	3	33	0.8275	3.16167	33.9	71.5	113.5	85.5	22	52.8	28	6	58	2.34	9.22	20.6
G199	KA/NAC//SERI/RAYON/3/GOUMRIA-14	ICW08-00244-8AP-0AP-0AP-2TR	64.5	104.5	65	24.725	40.825	43	4	43	0.6425	3.535	33.3	68	114.5	83	23.55	50.75	28	5	59	4.89	9.32	19.8
G200	KATILA-11//SHUHA-8/DUCULA	ICW07-0577-2AP-0AP-0AP-5AP	63	107	66.5	24.675	50.425	47	3.5	38.5	1.0075	3.945	41	69.5	111.5	83.5	23	54.65	36	4	57.5	2.55	9.35333	17.3
	KATILA-11//SHUHA-8/DUCULA	ICW07-0577-8AP-0AP-0AP-1AP	70.5	107.5	70	24.025	48.35	41	3.5	46.5	0.97	3.96833	36	69	111	83	26.4	51.1	32	7	66.5	3.57	9.38	15.4
	KATILA-11//SHUHA-8/DUCULA	ICW07-0577-8AP-0AP-0AP-2AP
	KATILA-13//PFAU/MILAN	ICW07-0578-6AP-0AP-0AP-5AP
	KATILA-13//PFAU/MILAN	ICW07-0578-6AP-0AP-0AP-4AP
	KATILA-9//HXL8088/DUCULA	ICW07-0460-3AP-0AP-0AP-1AP-0KUL
	KBG-01//MILAN/PASTOR	ICW07-0372-0AP-0AP-0AP-1AP
	KBG-01//MILAN/PASTOR	ICW07-0372-0AP-0AP-0AP-2AP
	KINGBIRD/3/NESMA*2/14-2//2*SAFI-3	ICW08-00298-6AP-0AP-0AP
	KINGBIRD/3/NESMA*2/14-2//2*SAFI-3	ICW08-00300-11AP-0AP-0AP-5KUL-010DZ
